# Supplementary material
Source: HighWire-hosted journal article supplement (https://www.ajnr.org/highwire/filestream/52884/field_highwire_adjunct_files/0/16-00889.pdf)
Supplement: 16-00889.pdf [file 16-00889.pdf]

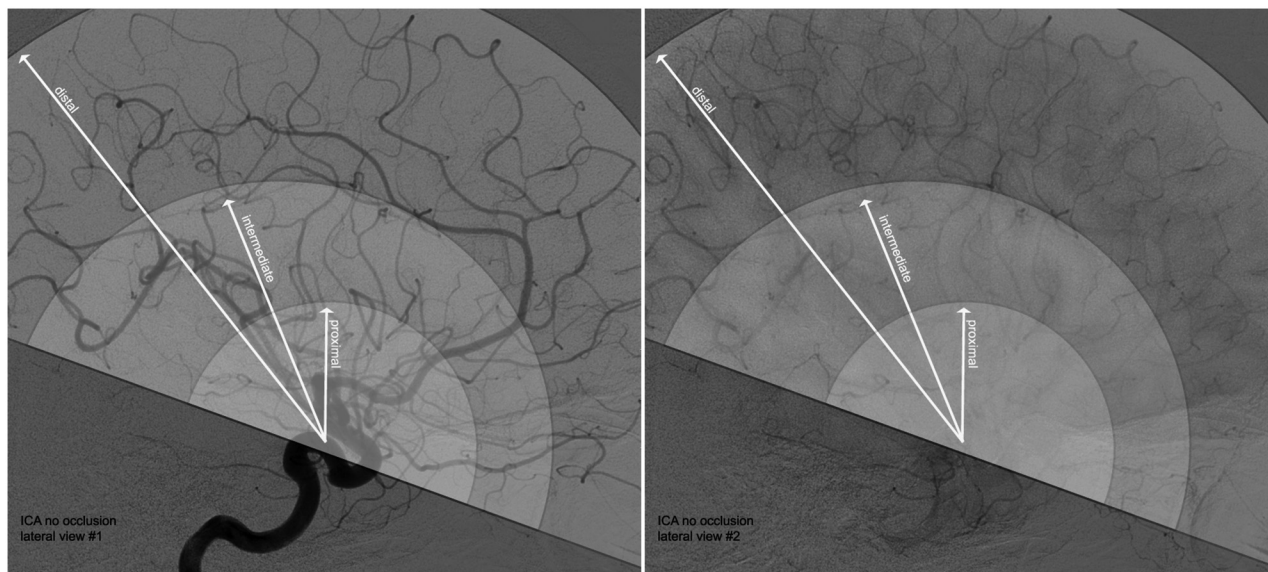

**ON-LINE FIG 1.** Schematic illustration of emboli classification due to PTF (proximal, intermediate, and distal) on a DSA image with normal findings in the lateral projection after injection into the ICA. Emboli were identified on anteroposterior and lateral DSA projections in a consensus read of 2 experienced raters.

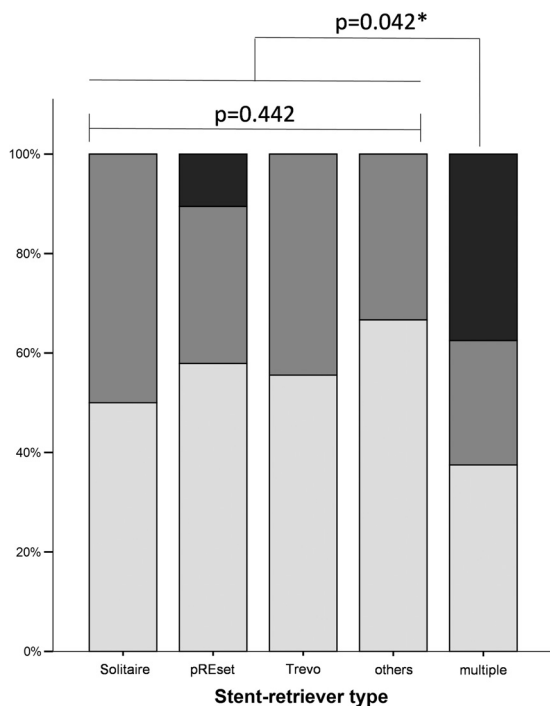

**ON-LINE FIG 2.** Distribution of final recanalization success (TICI score) stratified according to different stent-retriever types. No significant difference for recanalization success could be observed between the different stent-retriever types: Solitaire ( $n = 45$ ), pREset 4–20 ( $n = 58$ ), Trevo ( $n = 29$ ), and others ( $n = 12$ ) ( $P = .442$ ). If different stent-retriever types were used during a single thrombectomy (multiple), lower rates of successful recanalizations were observed compared with single-device recanalizations ( $P = .042$ ).

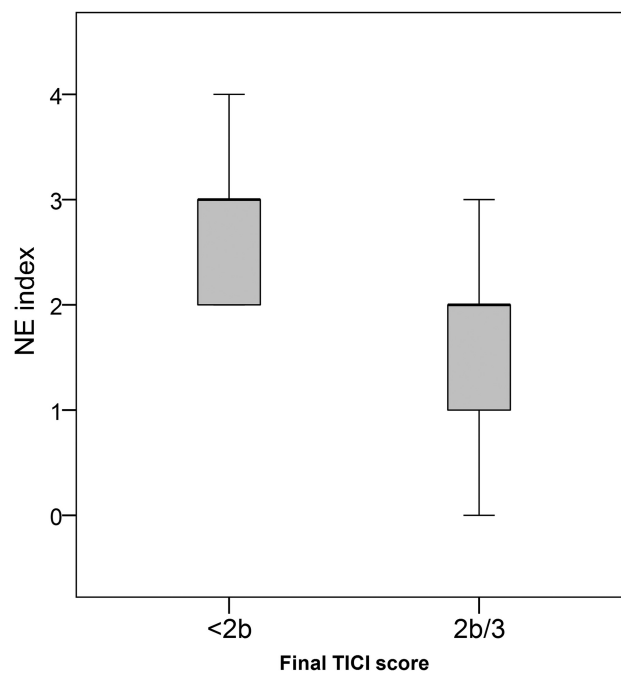

**ON-LINE FIG 3.** Distribution of different grades of neutrophil invasion as revealed by neutrophil elastase staining grades for patients with and without successful recanalizations.

**On-line Table: Spearman correlation coefficients for time of POS recanalization, number of maneuvers, emboli localization (proximal, intermediate, or distal), age, and time to groin puncture**

| Correlations               | Time to POS Recanalization      | Maneuvers                       | All Emboli                     | Distal Emboli                   | Intermediate Emboli             | Proximal Emboli                | Age                             | Time to Groin Puncture |
|----------------------------|---------------------------------|---------------------------------|--------------------------------|---------------------------------|---------------------------------|--------------------------------|---------------------------------|------------------------|
| Time to POS recanalization | —                               | 0.817 <sup>a</sup><br>P < .001  | -0.200<br>P = .067             | -0.320 <sup>a</sup><br>P = .003 | -0.204<br>P = .61               | 0.146<br>P = .181              | 0.123<br>P = .262               | 0.092<br>P = .441      |
| Maneuvers                  | 0.817 <sup>a</sup><br>P < .001  | —                               | -0.199<br>P = .068             | -0.226 <sup>b</sup><br>P = .037 | -0.233 <sup>b</sup><br>P = .032 | 0.143<br>P = .193              | 0.154<br>P = .158               | 0.085<br>P = .480      |
| All emboli                 | -0.200<br>P = .067              | -0.199<br>P = .068              | —                              | 0.540 <sup>a</sup><br>P < .001  | 0.720 <sup>a</sup><br>P < .001  | 0.432 <sup>a</sup><br>P < .001 | 0.279 <sup>a</sup><br>P = .010  | -0.46<br>P = .699      |
| Distal emboli              | -0.320 <sup>a</sup><br>P = .003 | -0.226 <sup>b</sup><br>P = .037 | 0.540 <sup>a</sup><br>P < .001 | —                               | 0.246 <sup>b</sup><br>P = .023  | -0.96<br>P = .383              | -0.173<br>P = .113              | -0.38<br>P = .754      |
| Intermediate emboli        | -0.204<br>P = .061              | -0.233 <sup>b</sup><br>P = .032 | 0.720 <sup>a</sup><br>P < .001 | 0.246 <sup>b</sup><br>P = .023  | —                               | 0.017<br>P = .877              | -0.277 <sup>b</sup><br>P = .010 | -0.121<br>P = .310     |
| Proximal emboli            | 0.146<br>P = .181               | 0.143<br>P = .193               | 0.432 <sup>a</sup><br>P < .001 | 0.96<br>P = .383                | 0.017<br>P = .877               | —                              | -0.79<br>P = .473               | 0.082<br>P = .495      |
| Age                        | 0.123<br>P = .262               | 0.154<br>P = .158               | 0.279 <sup>a</sup><br>P = .010 | -0.173<br>P = .113              | -0.277 <sup>b</sup><br>P = .010 | -0.79<br>P = .473              | —                               | 0.066<br>P = .583      |
| Time to groin puncture     | 0.092<br>P = .441               | 0.085<br>P = .480               | -0.46<br>P = .699              | -0.38<br>P = .754               | 0.121<br>P = .310               | -0.79<br>P = .473              | -0.066<br>P = .583              | —                      |

<sup>a</sup> P < .01.  
<sup>b</sup> P < .05.
